# Supplementary material for: Controllable photodeposition of nickel phosphide cocatalysts on cadmium sulfide nanosheets for enhanced photocatalytic hydrogen evolution performance
Source: Royal Society of Chemistry journal article supplement (doi:10.1039/c9nj06403f), 2020-01-01
Supplement: c9nj06403f1.pdf [file c9nj06403f1.pdf]

## **Table of contents**

**Table S1** Composition of different electrolytes used in the electrochemical test of CdS-NiP<sub>x</sub>.

**Fig. S1** TEM and HRTEM images of CdS.

**Table S2** Approximate content of NiP<sub>x</sub> in CdS-NiP<sub>x</sub> photocatalysts.

**Fig. S2** Wide scan XPS spectra of CdS and CdS-20NiP<sub>x</sub>.

**Fig. S3** The Tauc plots of CdS and CdS-20NiP<sub>x</sub> obtained from Fig. 5(a).

**Fig. S4** Proposed preparation process of CdS-NiP<sub>x</sub> by photochemical reduction method.

**Fig. S5** Time courses of photocatalytic hydrogen production of different CdS-NiP<sub>x</sub> and bare CdS, and long-term photocatalytic hydrogen production of CdS-20NiP<sub>x</sub>.

**Fig. S6** Time courses of photocatalytic hydrogen production of CdS with different sacrificial agents.

Table S1 Composition of different electrolytes used in the electrochemical test of CdS-NiP<sub>x</sub>.

|   | NiCl <sub>2</sub> (0.1M)/ml | Na <sub>2</sub> H <sub>2</sub> PO <sub>2</sub> (0.2M)/ml | H <sub>2</sub> O/ml |
|---|-----------------------------|----------------------------------------------------------|---------------------|
| A | 20                          | 0                                                        | 30                  |
| B | 0                           | 20                                                       | 30                  |
| C | 20                          | 20                                                       | 10                  |

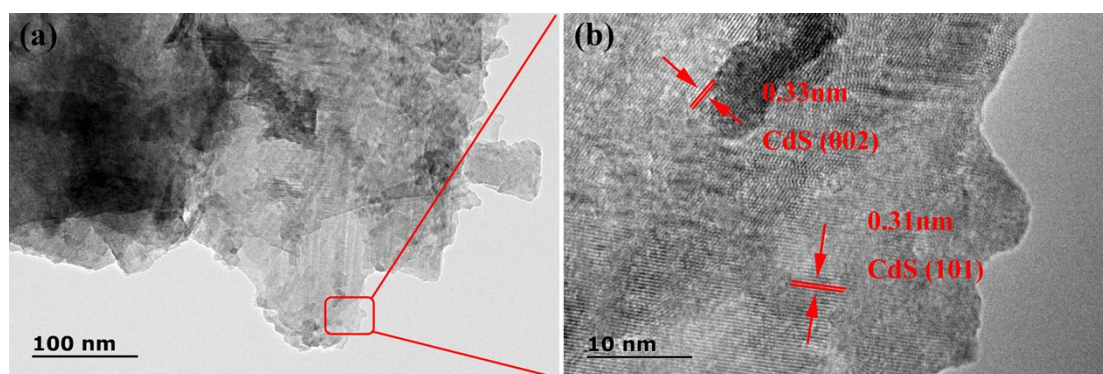

Figure S1 TEM (a) and HRTEM (b) images of CdS.

Table S2 Approximate content of NiP<sub>x</sub> in CdS-NiP<sub>x</sub> photocatalysts.

| Samples                | Content | wt. % |      | at. % |      | wt. % NiP <sub>x</sub> |
|------------------------|---------|-------|------|-------|------|------------------------|
|                        |         | Ni    | P    | Ni    | P    |                        |
| CdS-5NiP <sub>x</sub>  |         | 0.30  | 0.70 | 0.40  | 2.00 | 1.00                   |
| CdS-10NiP <sub>x</sub> |         | 0.36  | 0.76 | 0.50  | 2.30 | 1.12                   |
| CdS-20NiP <sub>x</sub> |         | 0.50  | 0.80 | 0.70  | 2.50 | 1.30                   |
| CdS-30NiP <sub>x</sub> |         | 0.70  | 1.20 | 1.00  | 3.30 | 1.90                   |

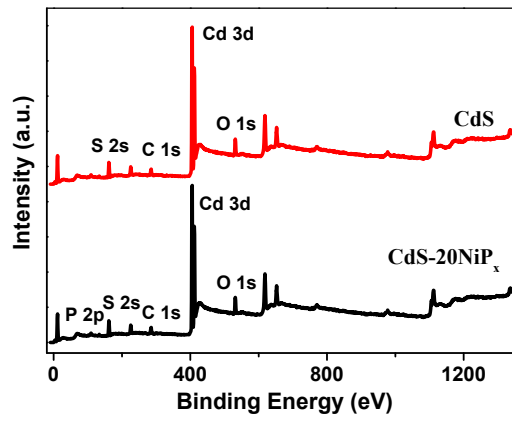

Figure S2 Wide scan XPS spectra of CdS and CdS-20NiP<sub>x</sub>.

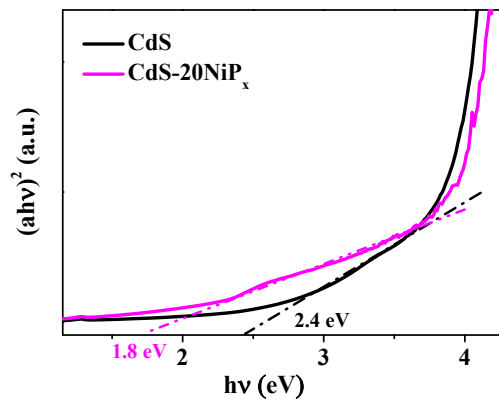

Figure S3 The Tauc plots of CdS and CdS-20NiP<sub>x</sub> obtained from Fig. 5(a).

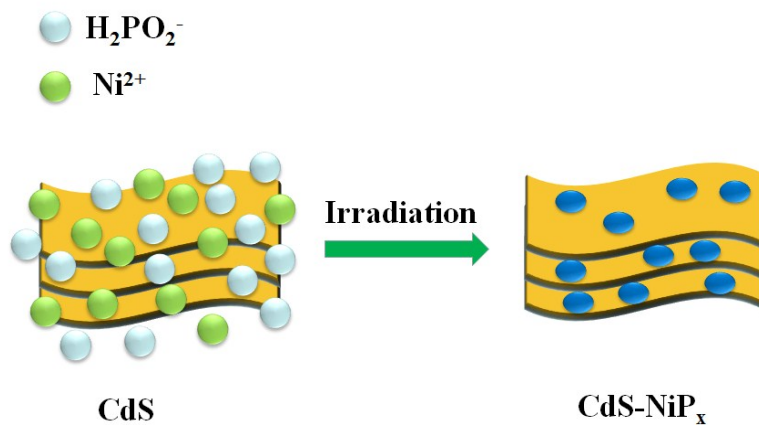

Figure S4 Proposed preparation process of CdS-NiP<sub>x</sub> by photochemical reduction method.

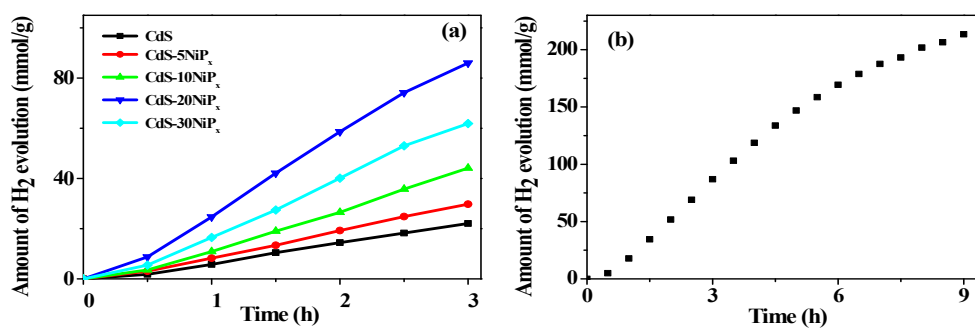

Figure S5 (a) Time courses of photocatalytic hydrogen production of different CdS-NiP<sub>x</sub> and bare CdS, and (b) long-term photocatalytic hydrogen production of CdS-20NiP<sub>x</sub>.

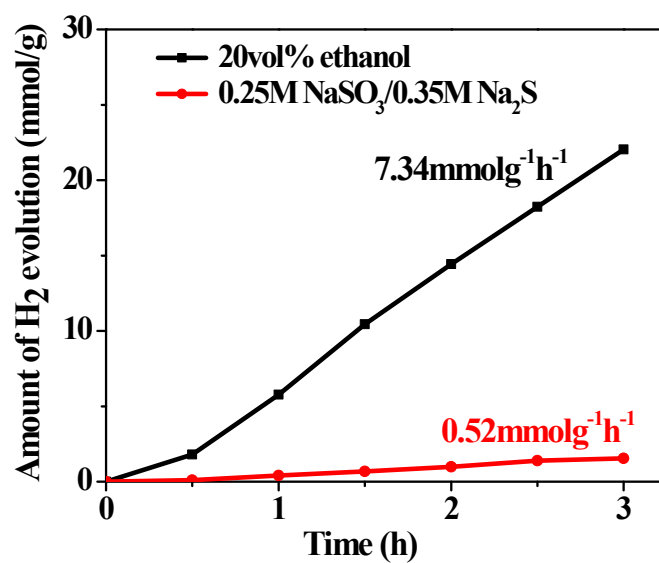

Figure S6 Time courses of photocatalytic hydrogen production of CdS with different sacrificial agents.
